# Supplementary material for: [Retracted] Prognosis and Therapeutic Efficacy Prediction of Adrenocortical Carcinoma Based on a Necroptosis‐Associated Gene Signature
Source: Hindawi journal article supplement (doi:10.1155/2022/8740408), 2022-01-01
Supplement: f1 [file 8740408.f1.docx]

**Supplementary Figures**


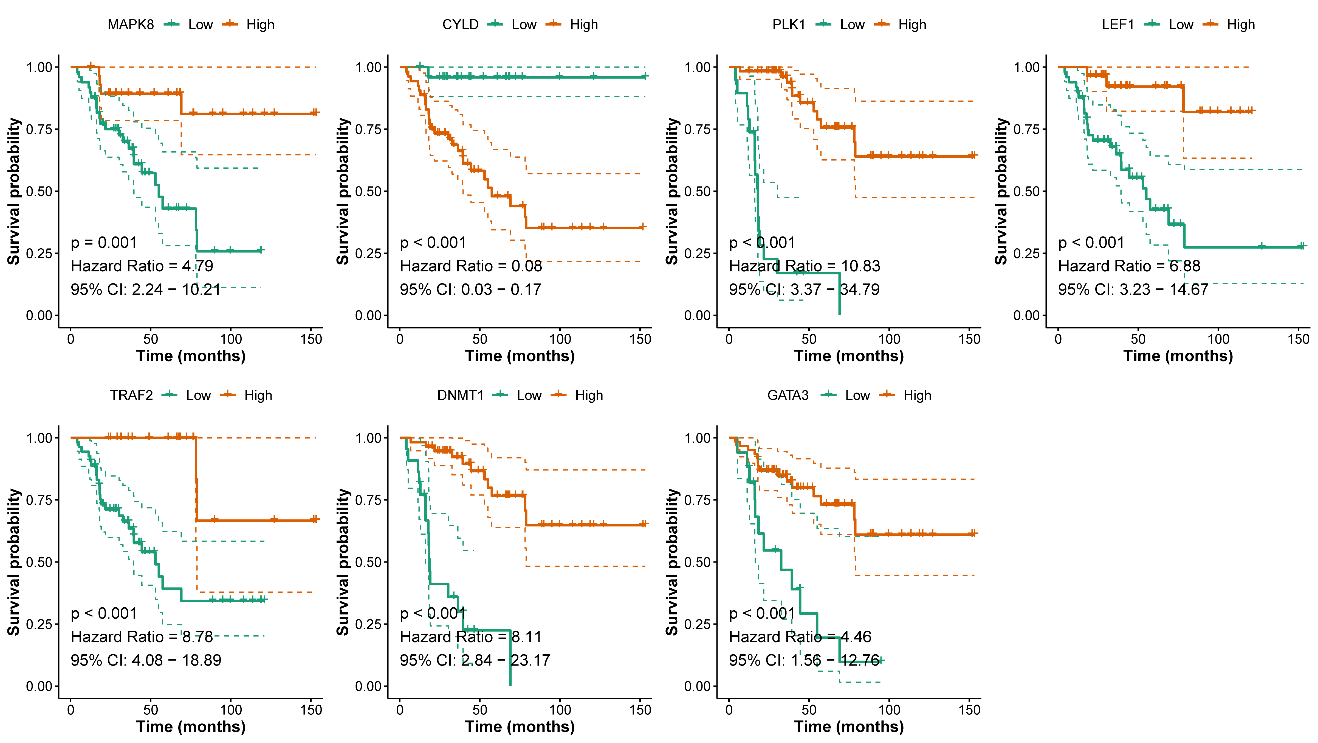


**Figure S1. K-M plot showing the prognostic value of seven selected genes in TCGA-ACC cohort.**

**
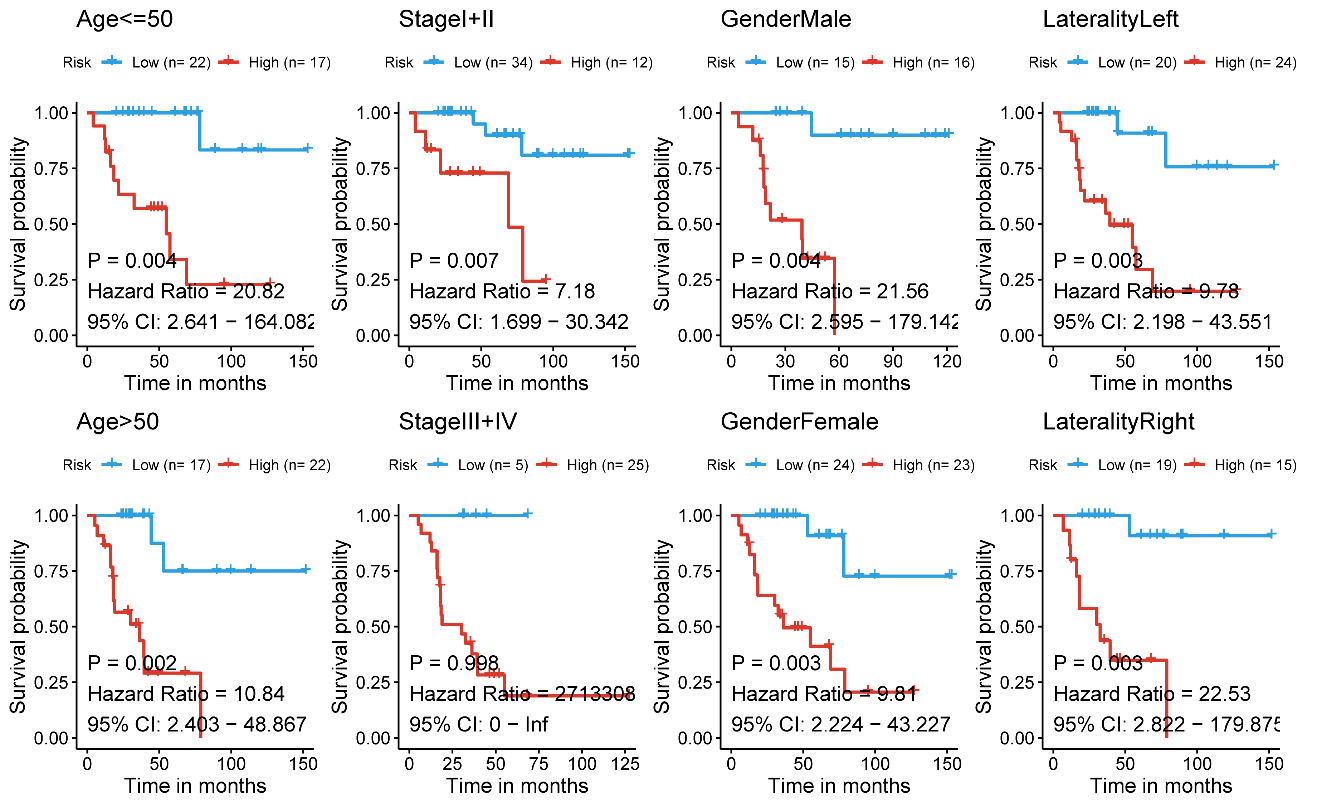
**

**Figure S2. K-M plot showing the prognostic value of NAGs among different clinical subgroups in TCGA-ACC cohort.**

**
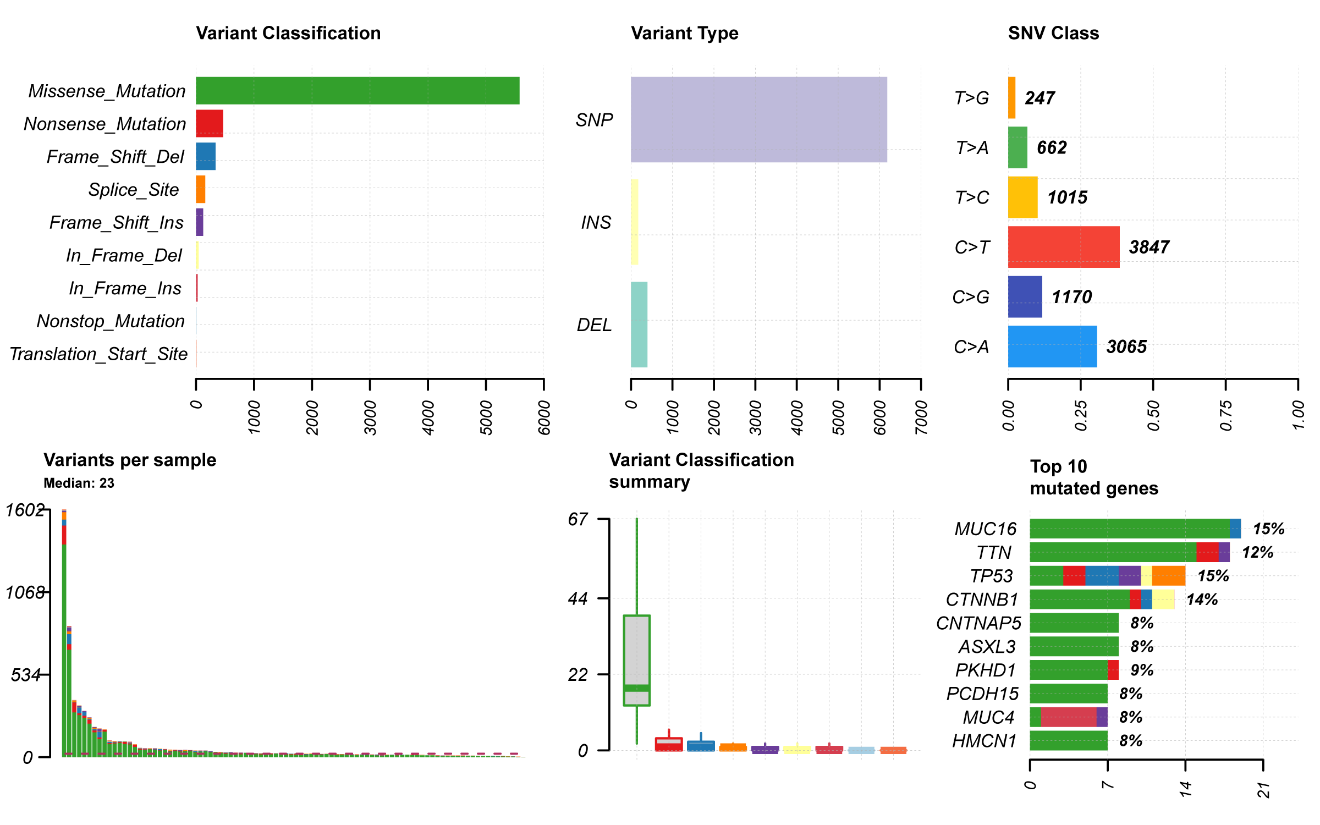
**

**Figure S3. Summary of the mutations in ACC patients from TCGA-ACC cohort.**

**
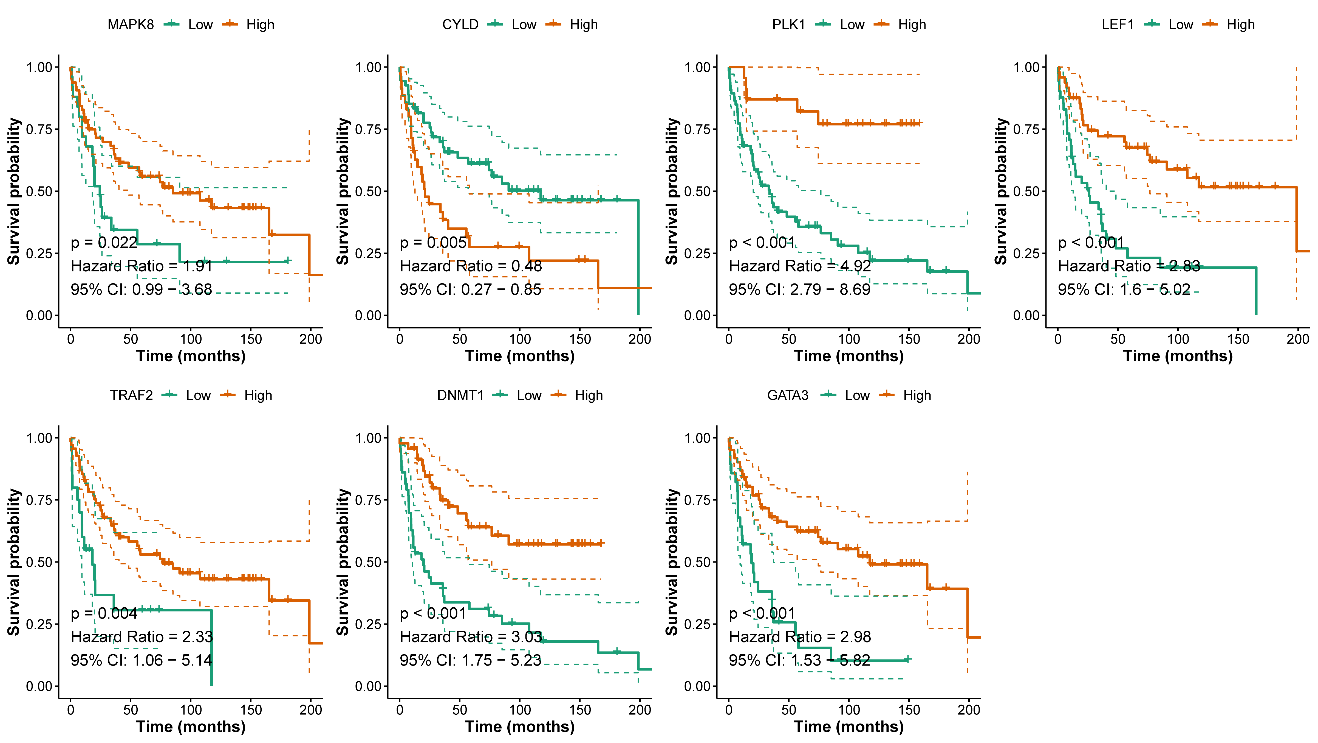
**

**Figure S4. K-M plot showing the prognostic value of seven selected genes in combined GEO cohort.**

**
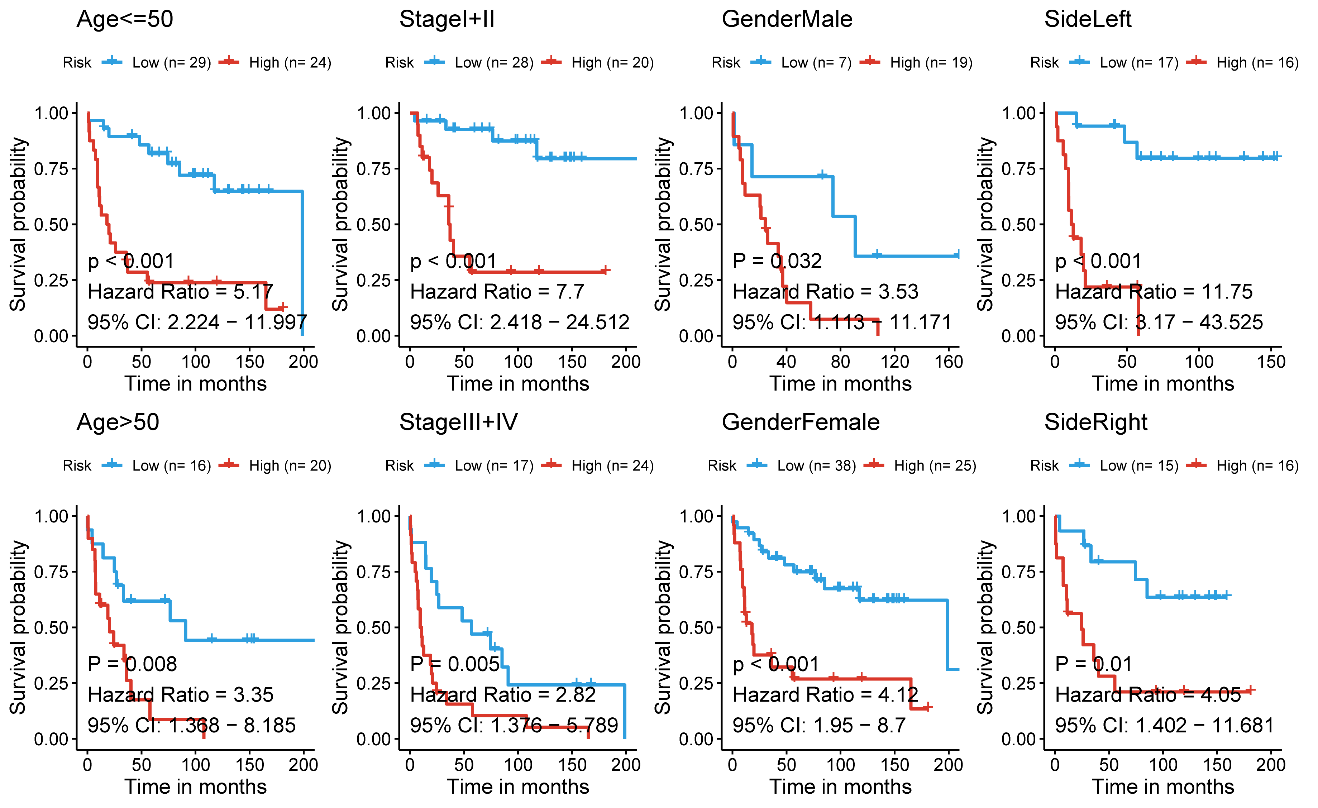
**

**Figure S5. K-M plot showing the prognostic value of NAGs among different clinical subgroups in combined GEO cohort.**
